# Supplementary material
Source: Springer Nature journal article supplement (https://www.springermedizin.de/resource/supplementary/12913_2009_1083_MOESM1_ESM.pdf/9536306)

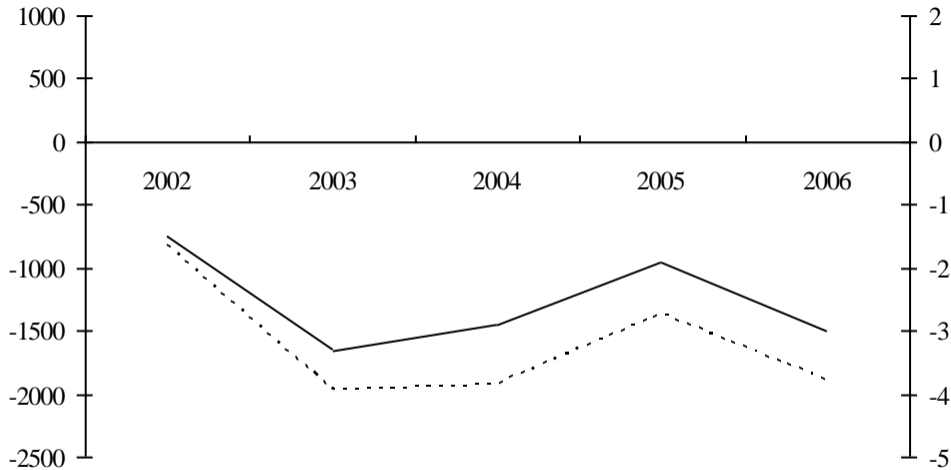

..... Million NOK — % of total revenues

Supplement: MOESM1 [file 9536306]
